# Supplementary material
Source: publisher figshare collection journal article supplement (https://brill.figshare.com/ndownloader/files/24715847)
Supplement: Supplementary file 1 [file 24715847]

**Timing of the evening emergence of Hilgendorf's tube-nosed bat  
(*Murina hilgendorfi*) in relation to roost type and season**

**Hayato Takada<sup>1, 2,\*</sup>**

<sup>1</sup> Mount Fuji Research Institute, Yamanashi Prefecture Government, 5597-1 Kenmarubi,  
Kamiyoshida, Fijiyoshida, Yamanashi 403-0005, Japan

<sup>2</sup> Laboratory of Wildlife Ecology and Conservation, School of Veterinary Medicine, Azabu  
University, 1-17-71 Fuchinobe, Chuo-ku, Sagamihara, Kanagawa 252-5201, Japan

Submitted: June 11, 2020; Final revision received: August 10, 2020. Accepted: September 17,  
2020

\*) Corresponding author: H. Takada; e-mail address: capricornis.murina.8810@gmail.com

**Supplementary material**

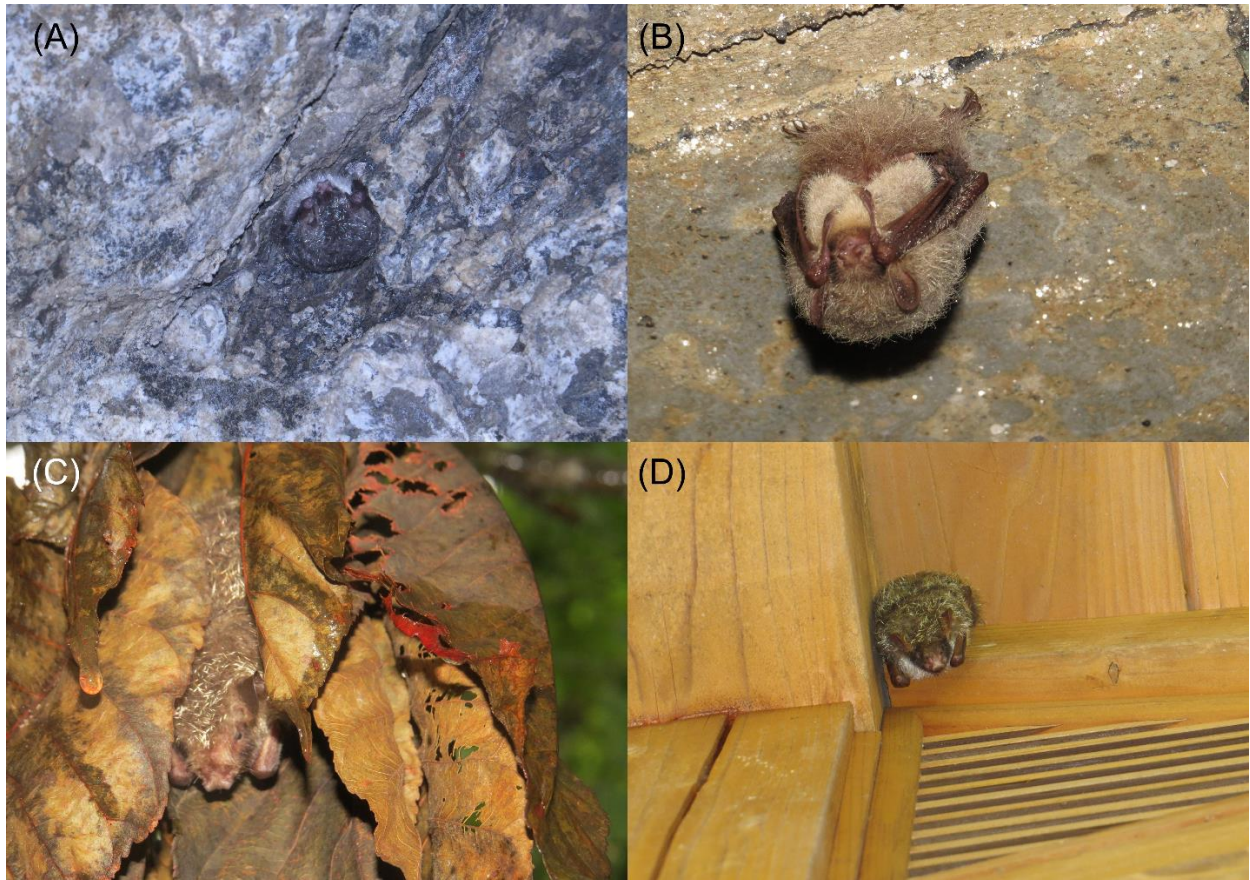

**Figure S1.** Hilgendorf's tube-nosed bats (*Murina hilgendorfi*) roosting at an abandoned mine (A), an abandoned tunnel (B), a foliage roost (C), and an outer wall of a building (D).
